# Supplementary material for: Bipolar resistive switching property of Si3N4−xthin films depending on N deficiency
Source: Royal Society of Chemistry journal article supplement (doi:10.1039/c9tc05336k), 2019-12-09
Supplement: c9tc05336k1.pdf [file c9tc05336k1.pdf]

## Supporting Information

### Bipolar resistive switching property of $\text{Si}_3\text{N}_{4-x}$ thin film depending on N-deficiency

Dae Eun Kwon, Yumin Kim, Hae Jin Kim, Young Jae Kwon, Kyung Seok Woo, Jung Ho Yoon, and Cheol Seong Hwang\*

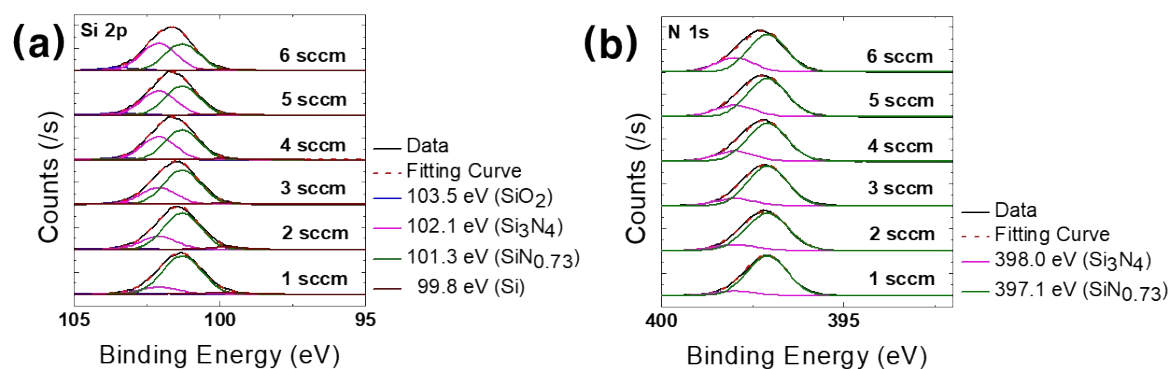

Fig. S1. Typical peak convolution of (a) Si and (b) N for 1~5 sccm  $\text{NH}_3$  flow rate devices.

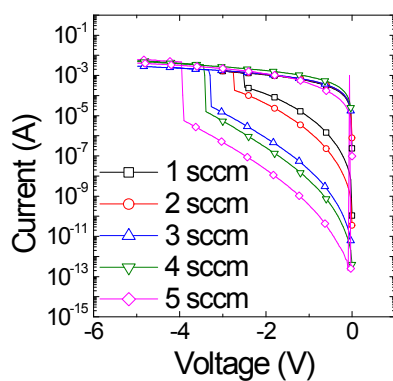

Fig. S2. Negative forming and LRS current curve for 1~5 sccm  $\text{NH}_3$  flow rate devices.

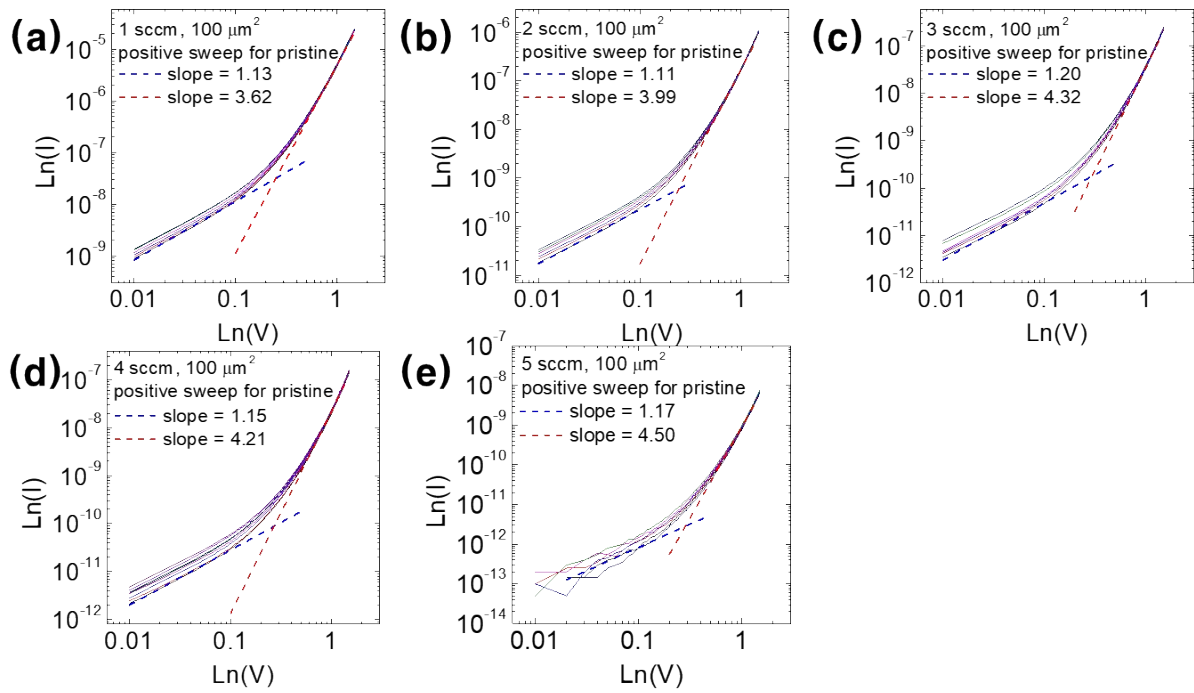

**Fig. S3.**  $\text{Ln}(I)$  vs.  $\text{Ln}(V)$  are drawn for pristine (a) 1 sccm, (b) 2 sccm, (c) 3 sccm, (d) 4 sccm and (e) 5 sccm, respectively.

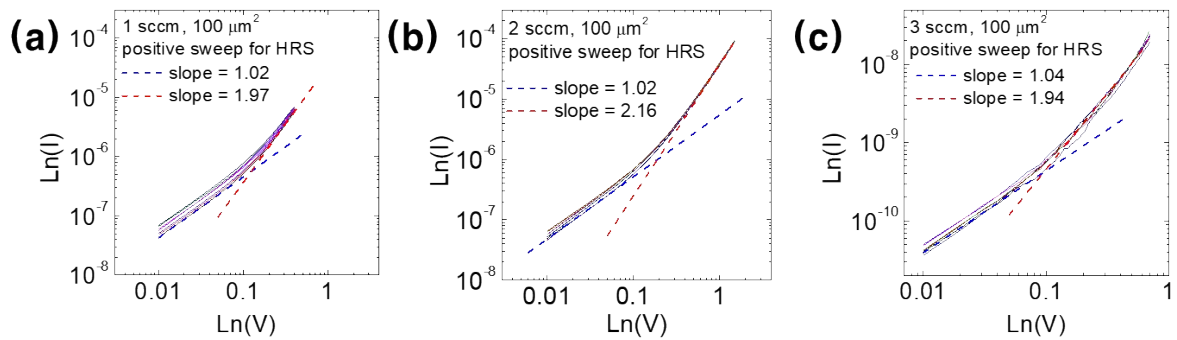

**Fig. S4.**  $\text{Ln}(I)$  vs.  $\text{Ln}(V)$  are drawn for HRS (a) 1 sccm, (b) 2 sccm, (c) 3 sccm, respectively.

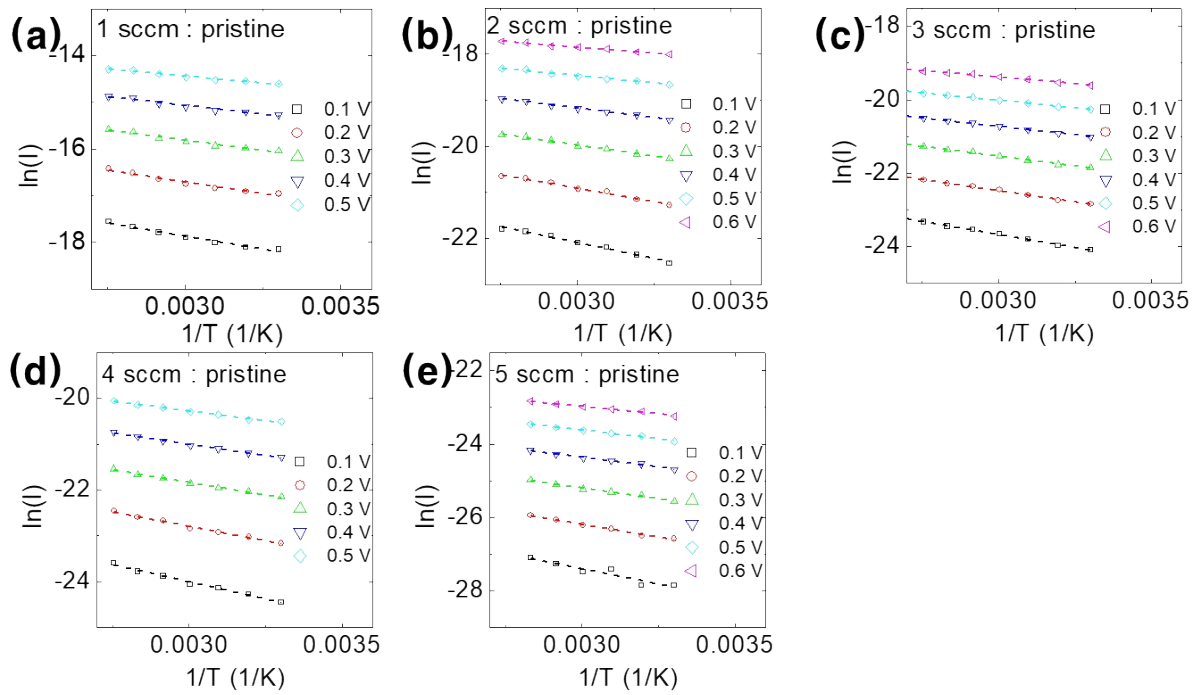

**Fig. S5.**  $\ln(I)$  vs.  $1/T$  are drawn for pristine (a) 1 sccm, (b) 2 sccm, (c) 3 sccm, (d) 4 sccm and (e) 5 sccm, respectively.

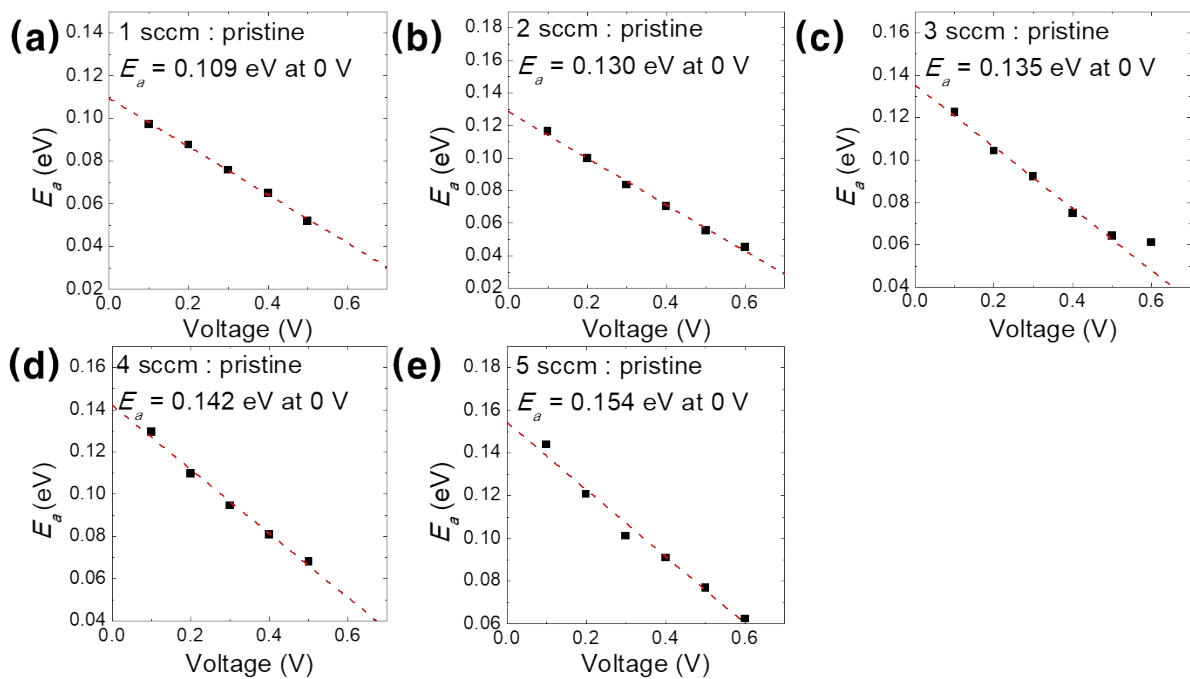

**Fig. S6.**  $E_a$  vs. Voltage are drawn for pristine (a) 1 sccm, (b) 2 sccm, (c) 3 sccm, (d) 4 sccm and (e) 5 sccm, respectively.

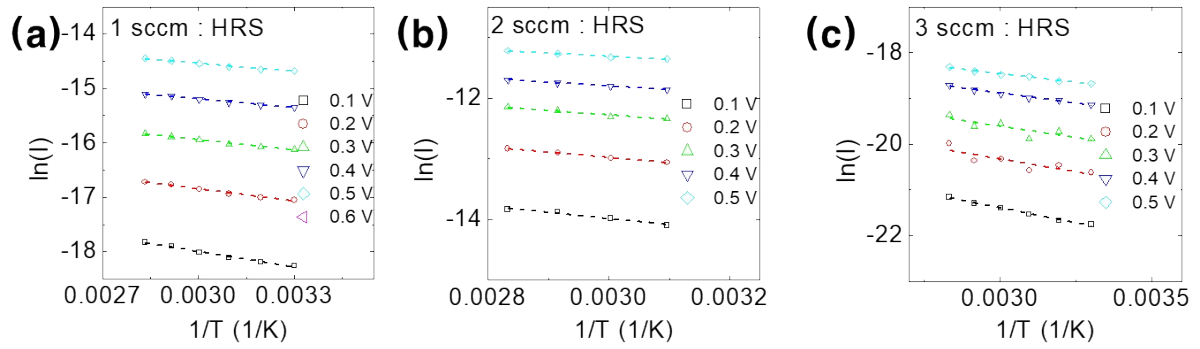

**Fig. S7.**  $\ln(I)$  vs.  $1/T$  are drawn for HRS (a) 1 sccm, (b) 2 sccm and (c) 3 sccm, respectively.

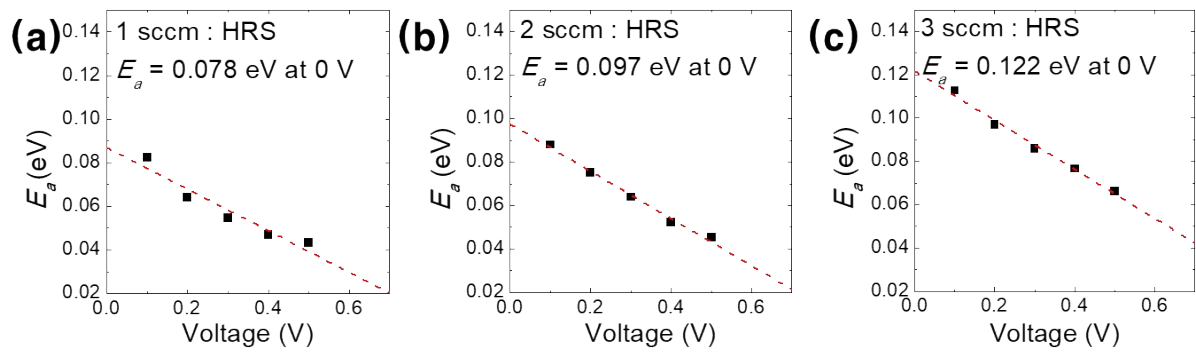

**Fig. S8.**  $E_a$  vs. Voltage are drawn for HRS (a) 1 sccm, (b) 2 sccm and (c) 3 sccm, respectively.
